# Supplementary material for: LC-MS in combination with DMBA derivatization for sialic acid speciation and distribution analysis in fish tissues
Source: Royal Society of Chemistry journal article supplement (doi:10.1039/d0ay00100g), 2020-01-01
Supplement: d0ay00100g1.pdf [file d0ay00100g1.pdf]

1 **Supporting Information**

2

3 **LC-MS in Combination with DMBA Derivatization for Sialic Acid Speciation**  
4 **and Distribution Analysis in Fish Tissues**

5

6 Junjie Du <sup>a</sup>, Qiwei Zhang <sup>\*a</sup>, Jianjun Li <sup>b</sup>, Qi Zheng <sup>a</sup>

7

8 <sup>a</sup>Key Laboratory of Optoelectronic Chemical Materials and Devices of Ministry of Education,  
9 Institute for Interdisciplinary Research, Institute of Environment and Health, Jiangnan University,  
10 Wuhan 430056, China

11 <sup>b</sup>National Research Council Canada, 100 Sussex Drive, Ottawa, ON, Canada K1A 0R6

12

13 \*Corresponding authors:

14 Dr. Qiwei Zhang, School of Chemical and Environmental Engineering, Jiangnan University,  
15 Wuhan, 430056, China, E-mail: [cvcon@msn.cn](mailto:cvcon@msn.cn)

16

17 Dr. Qi Zheng, School of Chemical and Environmental Engineering, Jiangnan University, Wuhan,  
18 430056, China, E-mail: [zq\\_1101@sina.com](mailto:zq_1101@sina.com)

19

## Table of Contents

|    |                                                                                                                           |     |
|----|---------------------------------------------------------------------------------------------------------------------------|-----|
| 21 |                                                                                                                           |     |
| 22 | <b>Fig. S1.</b> The schematic diagram of DMBA derivatization of sialic acid.....                                          | S3  |
| 23 | <b>Fig. S2.</b> The effect of LC gradients on the separation of different sialic acids.....                               | S4  |
| 24 | <b>Fig. S3.</b> The effect of column temperature on the separation of sialic acids.....                                   | S5  |
| 25 | <b>Fig. S4.</b> LC-MS/MS analysis of DMBA-labeled mono- <i>O</i> -acetylated <i>N</i> -glycolylneuraminic acids           |     |
| 26 | ( <i>m/z</i> 468.20) from crucian carp blood.....                                                                         | S6  |
| 27 | <b>Fig. S5.</b> LC-MS analysis of DMB-labeled sialic acids from crucian carp blood.....                                   | S7  |
| 28 | <b>Fig. S6.</b> LC-MS/MS analysis of DMBA-labeled di- <i>O</i> -acetylated <i>N</i> -acetylneuraminic acids ( <i>m/z</i>  |     |
| 29 | 494.21) from crucian carp blood .....                                                                                     | S8  |
| 30 | <b>Fig. S7.</b> LC-MS/MS analysis of DMBA-labeled tri- <i>O</i> -acetylated <i>N</i> -acetylneuraminic acids ( <i>m/z</i> |     |
| 31 | 536.22) from crucian carp blood.....                                                                                      | S9  |
| 32 | <b>Table S1.</b> Detected sialic acids in crucian carp blood with their relative retention times and                      |     |
| 33 | characteristic ions.....                                                                                                  | S10 |
| 34 |                                                                                                                           |     |
| 35 |                                                                                                                           |     |

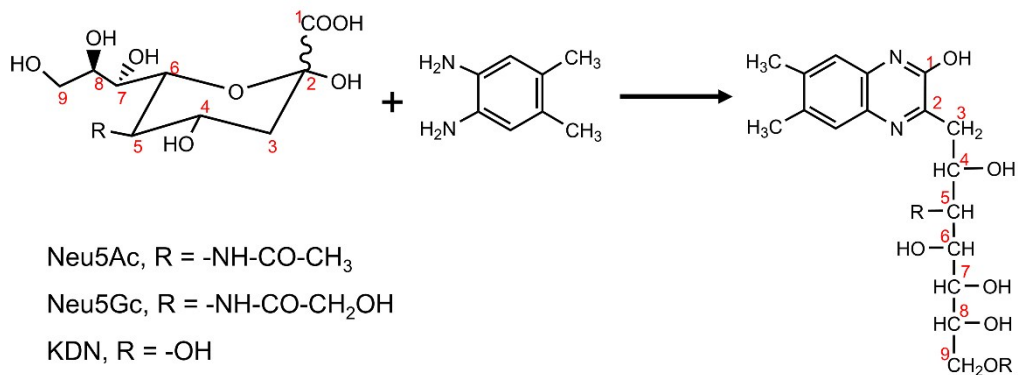

36

37 **Fig. S1.** The schematic diagram of DMBA derivatization of sialic acid.

38

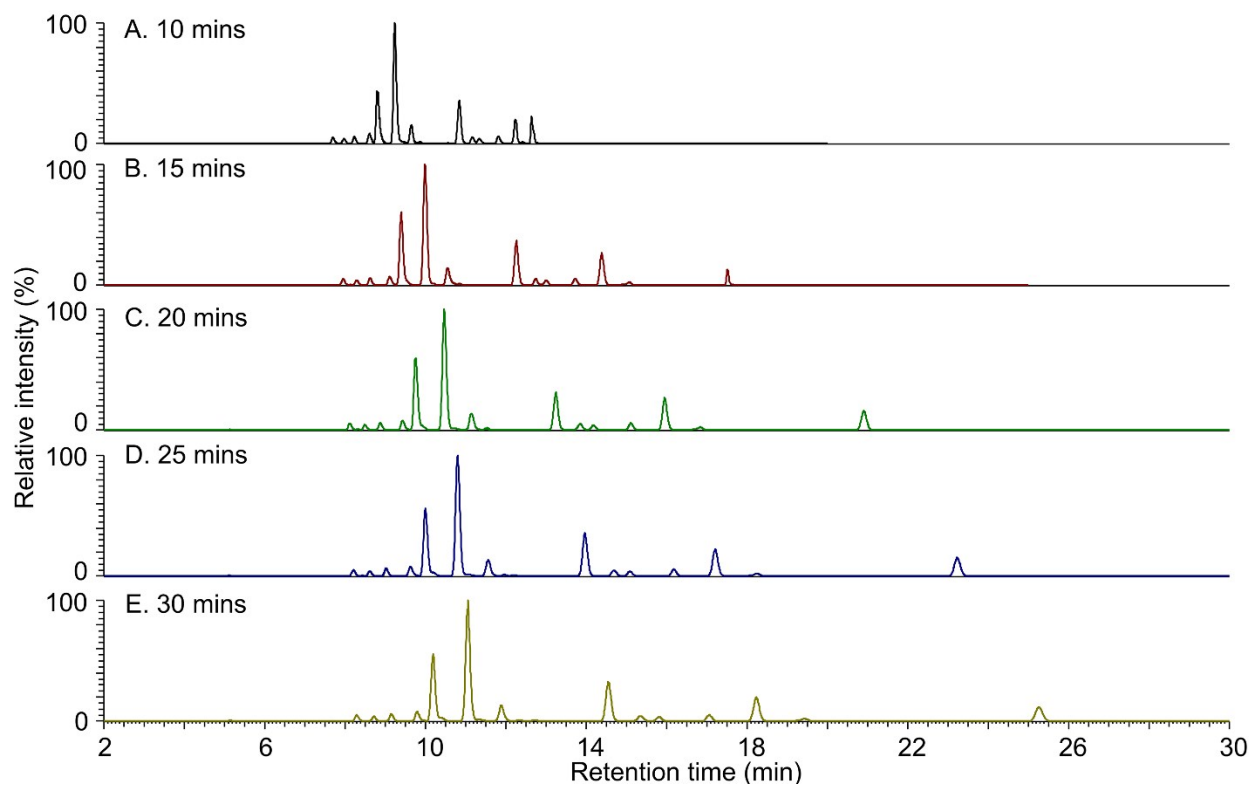

39

40 **Fig. S2.** The effect of LC gradients on the separation of different sialic acids. XICs are the sum of  
 41 ions at  $m/z$  452.20, 468.20, 494.21 and 536.22. The mobile phase B was increased from 10 % at 3  
 42 min to 20 % at different time. (A) 10 min; (B) 15 min; (C) 20 min; (D) 25 min; (E) 30 min.

43

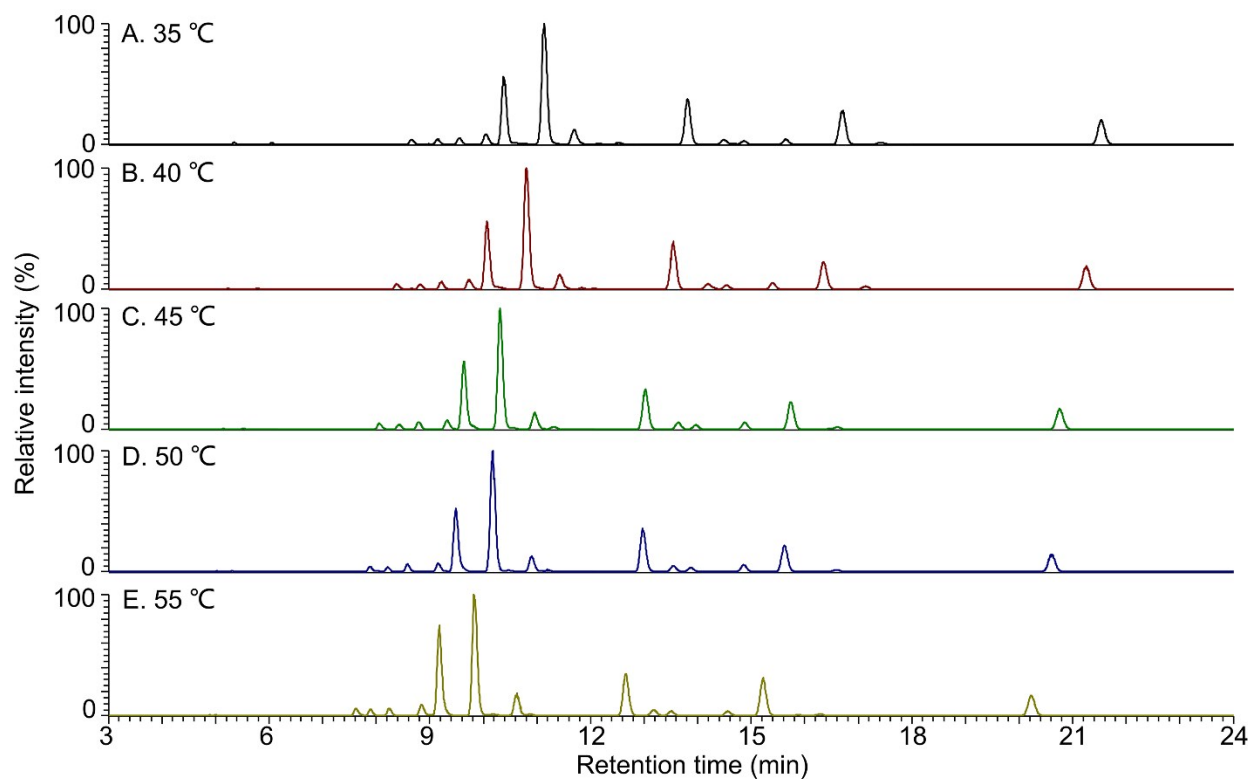

44

45 **Fig. S3.** The effect of column temperature on the separation of sialic acids. The XICs are the sum  
 46 of ion at  $m/z$  452.20, 468.20, 494.21 and  $m/z$  536.22. (A) 35 °C; (B) 40 °C; (C) 45 °C; (D) 50 °C;  
 47 (E) 55 °C.

48

49

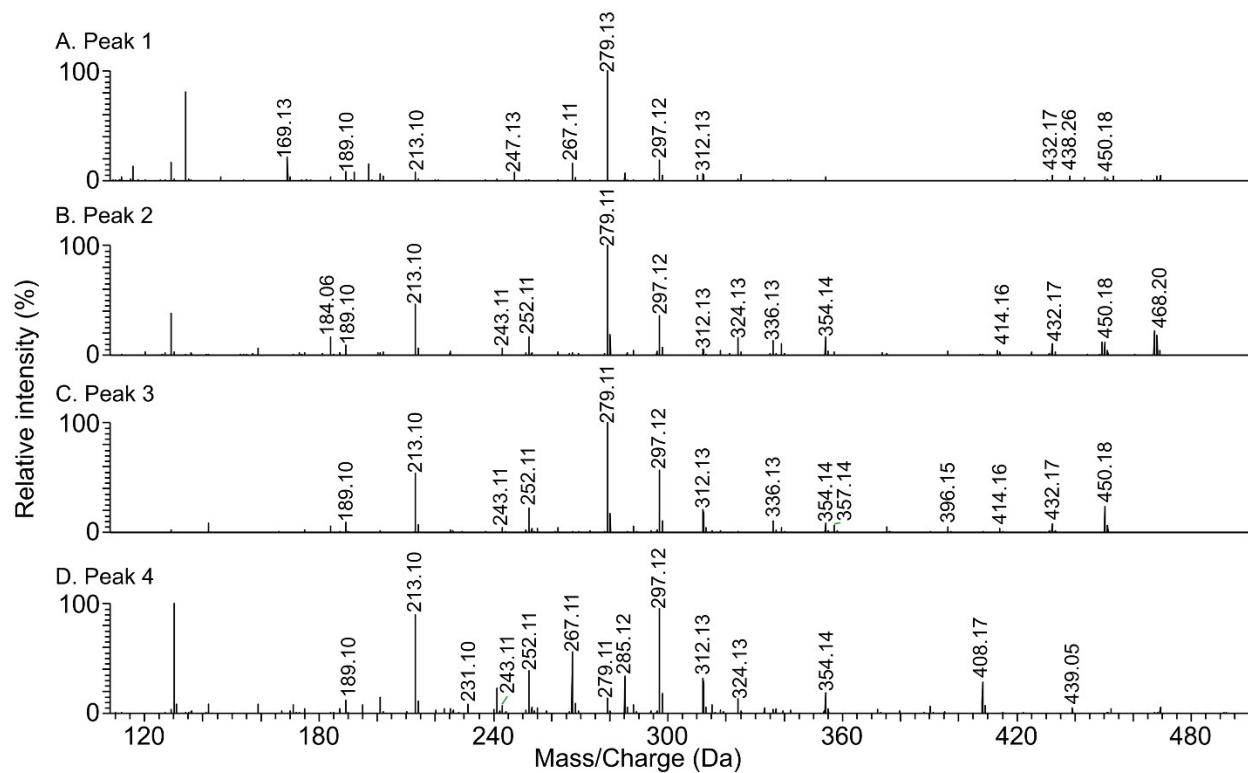

50

51 **Fig. S4.** LC-MS/MS analysis of DMBA-labeled mono-*O*-acetylated *N*-glycolylneuraminic acids  
 52 from crucian carp blood. (A) MS/MS spectrum extracted at Peak 1; (B) MS/MS spectrum extracted  
 53 at Peak 2; (C) MS/MS spectrum extracted at Peak 3; (D) MS/MS spectrum extracted at Peak 4.

54

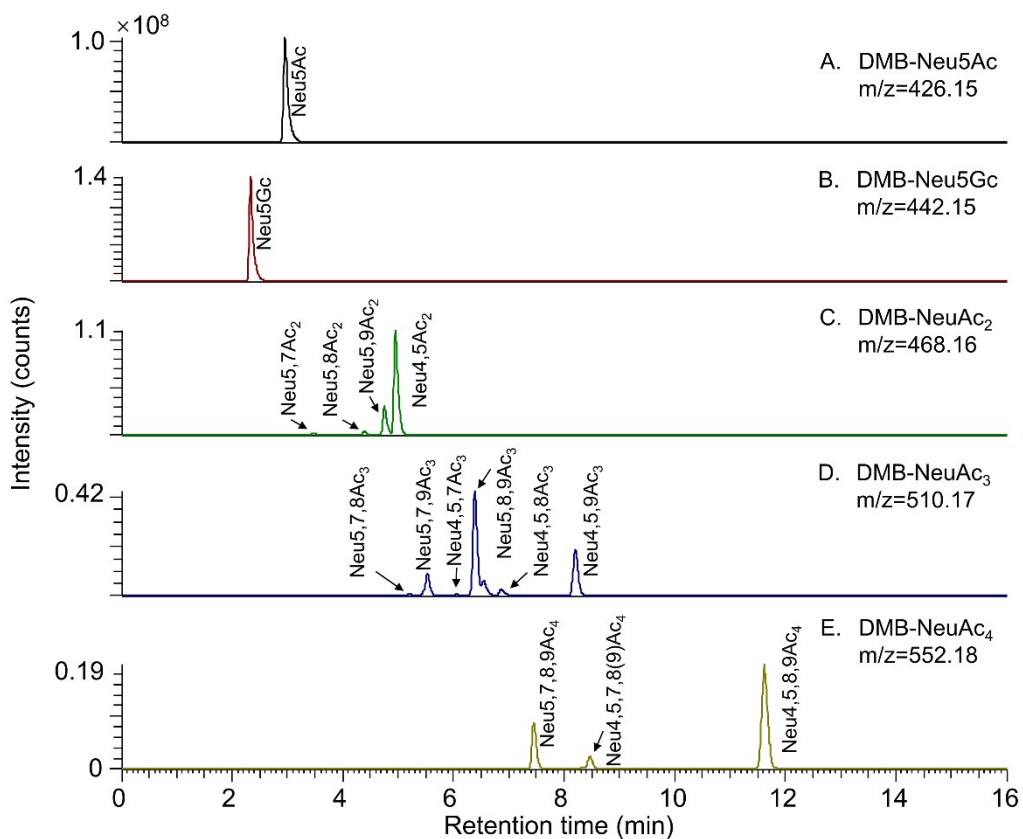

55

56 **Fig. S5.** LC-MS analysis of DMB-labeled sialic acids from crucian carp blood. (A) XIC at  $m/z$   
 57 426.15 (Neu5Ac); (B) XIC at  $m/z$  442.15 (Neu5Gc); (C) XIC at  $m/z$  468.16 (NeuAc<sub>2</sub>); (D) XIC at  
 58  $m/z$  510.17 (NeuAc<sub>3</sub>); (E) XIC at  $m/z$  552.18 (NeuAc<sub>4</sub>).

59

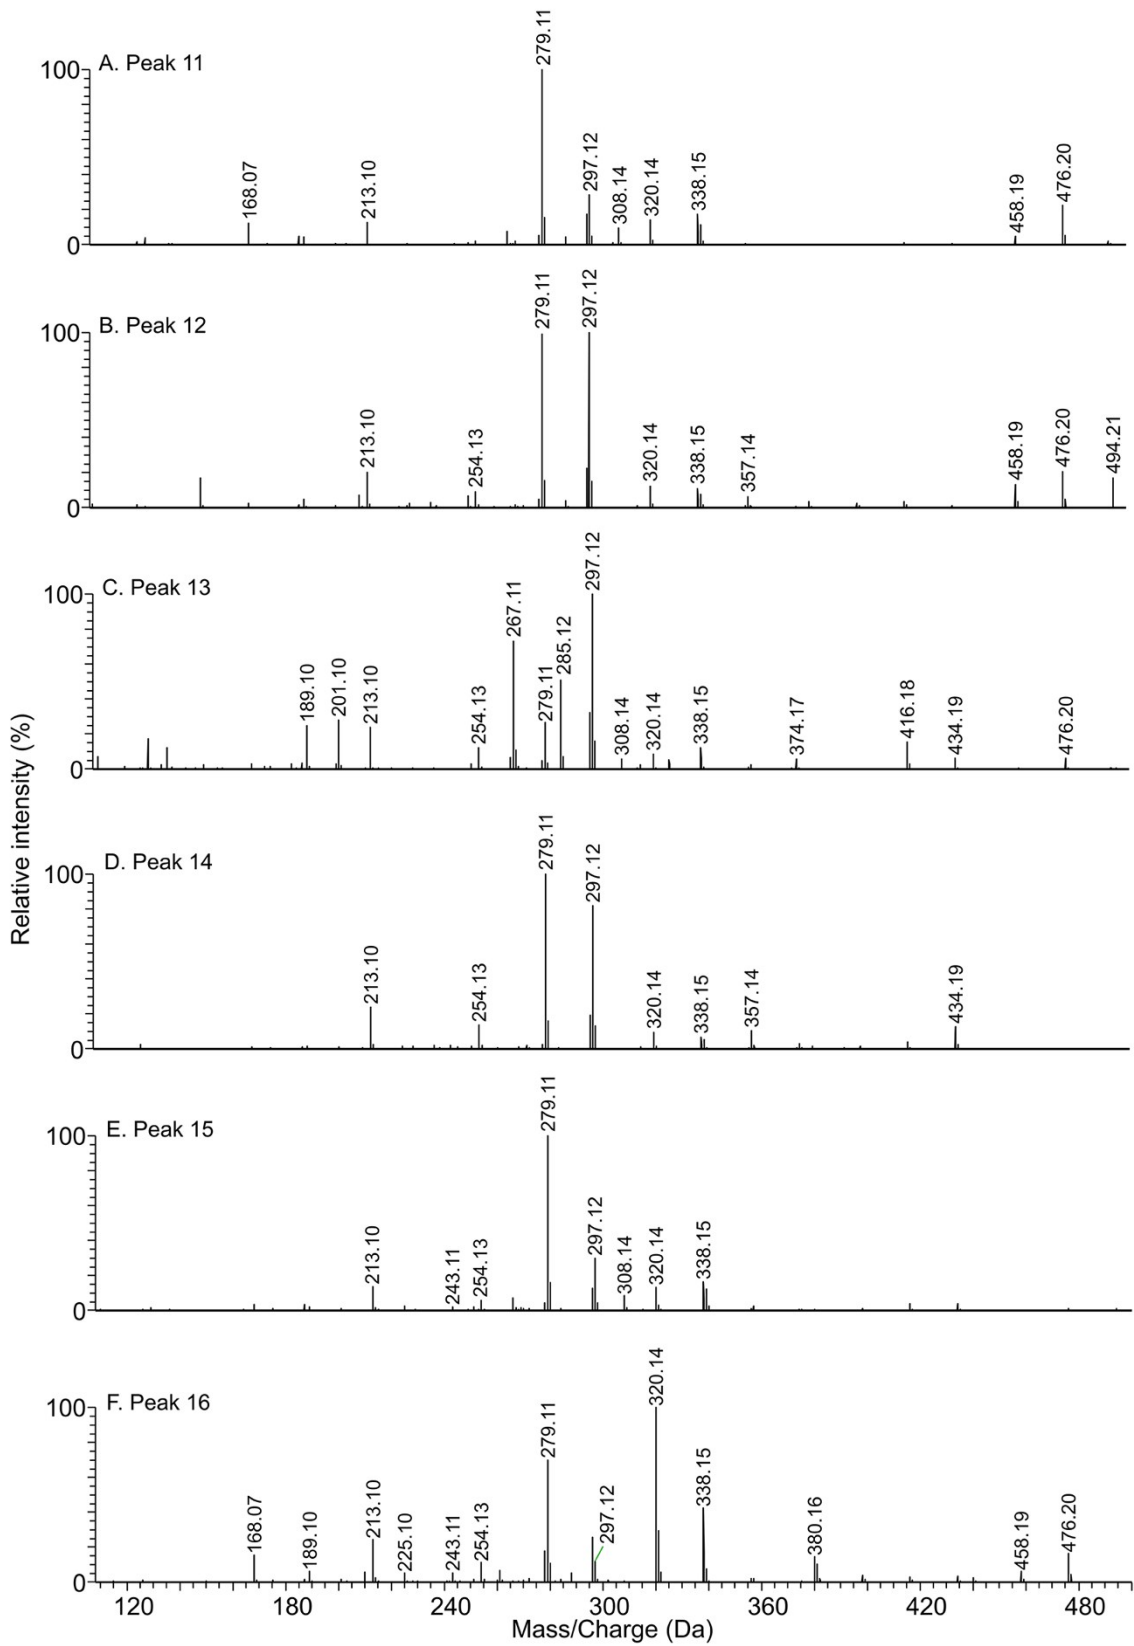



61 **Fig. S6.** LC-MS/MS analysis of DMBA-labeled di-*O*-acetylated *N*-acetylneuraminic acids (*m/z*  
 62 494.21) from crucian carp blood. (A) MS/MS spectrum extracted at Peak 11; (B) MS/MS  
 63 spectrum extracted at Peak 12; (C) MS/MS spectrum extracted at Peak 13; (D) MS/MS spectrum  
 64 extracted at Peak 14; (E) MS/MS spectrum extracted at Peak 15; (F) MS/MS spectrum extracted  
 65 at Peak 16.

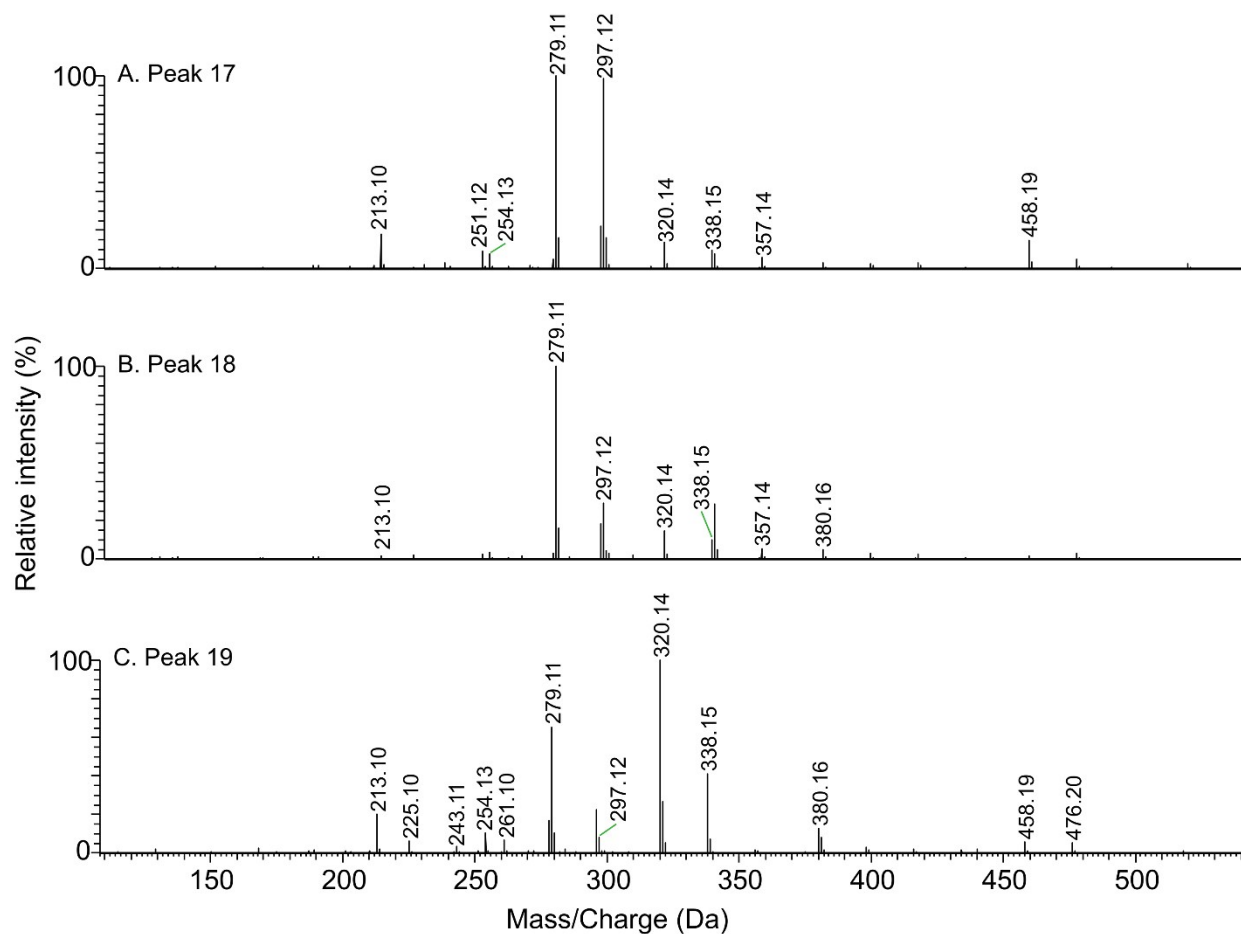

66  
 67 **Fig. S7.** LC-MS/MS analysis of DMBA-labeled tri-*O*-acetylated *N*-acetylneuraminic acids (*m/z*  
 68 536.22) from crucian carp blood. (A) MS/MS spectrum extracted at Peak 17; (B) MS/MS spectrum  
 69 extracted at Peak 18; (C) MS/MS spectrum extracted at Peak 19.

70

71 **Table S1.** Detected sialic acids in crucian carp blood with their relative retention times and  
 72 characteristic ions.

| Peak No. | Sialic acid                                            | Abbreviation          | Retention time (min) | RRT <sub>1</sub> | RRT <sub>2</sub> | m/z [M+H] <sup>+</sup> | Characteristic ions                                    |
|----------|--------------------------------------------------------|-----------------------|----------------------|------------------|------------------|------------------------|--------------------------------------------------------|
| 1        | 7- <i>O</i> -Acetyl- <i>N</i> -glycolylneuraminic acid | Neu5Gc7Ac             | 7.49                 | 1.01             | 0.98             | 468.20                 | 213.10, 267.11, 279.13, 297.12, 450.18                 |
| 2        | 8- <i>O</i> -Acetyl- <i>N</i> -glycolylneuraminic acid | Neu5Gc8Ac             | 8.27                 | 1.11             | 1.09             | 468.20                 | 213.10, 243.11, 279.11, 297.12, 450.18                 |
| 3        | 9- <i>O</i> -Acetyl- <i>N</i> -glycolylneuraminic acid | Neu5Gc9Ac             | 8.42                 | 1.13             | 1.21             | 468.20                 | 213.10, 243.11, 279.11, 297.12, 450.18                 |
| 4        | 4- <i>O</i> -Acetyl- <i>N</i> -glycolylneuraminic acid | Neu4Ac5Gc             | 8.79                 | 1.18             | 1.23             | 468.20                 | 213.10, 243.11, 267.11, 279.11, 297.12, 408.17         |
| 5        | <i>N</i> -Acetylneuraminic acid                        | Neu5Ac                | 7.44                 | 1.00             | 1.00             | 410.19                 | 213.10, 243.11, 267.11, 279.11, 285.12, 297.12, 392.18 |
| 6        | <i>N</i> -Glycolylneuraminic acid                      | Neu5Gc                | 6.60                 | 0.89             | 0.84             | 426.19                 | 213.10, 243.11, 267.11, 279.11, 285.12, 297.12, 408.17 |
| 7        | 7- <i>O</i> -Acetyl- <i>N</i> -acetylneuraminic acid   | Neu5,7Ac <sub>2</sub> | 8.05                 | 1.08             | 1.12             | 452.20                 | 201.10, 213.10, 267.11, 279.11, 285.12, 297.12, 434.19 |
| 8        | 8- <i>O</i> -Acetyl- <i>N</i> -acetylneuraminic acid   | Neu5,8Ac <sub>2</sub> | 9.32                 | 1.25             | 1.40             | 452.20                 | 213.10, 243.11, 279.11, 297.12, 434.19                 |
| 9        | 9- <i>O</i> -Acetyl- <i>N</i> -acetylneuraminic acid   | Neu5,9Ac <sub>2</sub> | 9.64                 | 1.30             | 1.59             | 452.20                 | 213.10, 243.11, 279.11, 297.12, 434.19                 |

|    |                                                                 |                              |       |      |      |        |                                                                |
|----|-----------------------------------------------------------------|------------------------------|-------|------|------|--------|----------------------------------------------------------------|
| 10 | 4- <i>O</i> -Acetyl- <i>N</i> -acetylneuraminic acid            | Neu4,5Ac <sub>2</sub>        | 10.31 | 1.39 | 1.70 | 452.20 | 201.10, 213.10, 243.11, 267.11, 279.11, 285.12, 297.12, 392.18 |
| 11 | 7,8-Di- <i>O</i> -acetyl- <i>N</i> -acetylneuraminic acid       | Neu5,7,8Ac <sub>3</sub>      | 10.56 | 1.42 | 1.77 | 494.21 | 213.10, 279.11, 297.12, 476.20                                 |
| 12 | 7,9-Di- <i>O</i> -acetyl- <i>N</i> -acetylneuraminic acid       | Neu5,7,9Ac <sub>3</sub>      | 10.96 | 1.47 | 2.03 | 494.21 | 213.10, 279.11, 297.12, 476.20                                 |
| 13 | 4,7-Di- <i>O</i> -acetyl- <i>N</i> -acetylneuraminic acid       | Neu4,5,7Ac <sub>3</sub>      | 11.32 | 1.52 | 2.51 | 494.21 | 213.10, 279.11, 285.12, 297.12, 434.19, 476.20                 |
| 14 | 8,9-Di- <i>O</i> -acetyl- <i>N</i> -acetylneuraminic acid       | Neu5,8,9Ac <sub>3</sub>      | 13.02 | 1.75 | 2.73 | 494.21 | 213.10, 243.11, 279.11, 297.12, 434.19                         |
| 15 | 4,8-Di- <i>O</i> -acetyl- <i>N</i> -acetylneuraminic acid       | Neu4,5,8Ac <sub>3</sub>      | 13.65 | 1.83 | 3.28 | 494.21 | 213.10, 243.11, 279.11, 297.12                                 |
| 16 | 4,9-Di- <i>O</i> -acetyl- <i>N</i> -acetylneuraminic acid       | Neu4,5,9Ac <sub>3</sub>      | 15.72 | 2.11 | 4.75 | 494.21 | 213.10, 243.11, 279.11, 297.12, 476.20                         |
| 17 | 7,8,9-Tri- <i>O</i> -acetyl- <i>N</i> -acetylneuraminic acid    | Neu5,7,8,9Ac <sub>4</sub>    | 14.88 | 2.00 | 3.81 | 536.22 | 213.10, 279.11, 297.12                                         |
| 18 | 4,7,8(9)-Tri- <i>O</i> -acetyl- <i>N</i> -acetylneuraminic acid | Neu4,5,7,8(9)Ac <sub>4</sub> | 16.62 | 2.23 | 4.99 | 536.22 | 213.10, 279.11, 297.12                                         |
| 19 | 4,8,9-Tri- <i>O</i> -acetyl- <i>N</i> -acetylneuraminic acid    | Neu4,5,8,9Ac <sub>4</sub>    | 20.75 | 2.79 | 9.51 | 536.22 | 213.10, 243.11, 279.11, 297.12                                 |

73 Relative retention time (RRT) is the ratio of the retention time of analyte relative to that of Neu5Ac.

74 RRT<sub>1S</sub> are the values from DMBA derivatization and obtained in this study. RRT<sub>2S</sub> are the values

75 from DMB derivatization that obtained from reference #28.

76
